# Supplementary material for: Daily preventive zinc supplementation increases the antibody response against pathogenic Escherichia coli in children with zinc insufficiency: a randomised controlled trial
Source: PubMed Central journal article supplement (PMC9515173; doi:10.1038/s41598-022-20445-8), 2022-09-27
Supplement: 41598_2022_20445_MOESM1_ESM.pdf [file 41598_2022_20445_MOESM1_ESM.pdf]

**Title:** Daily preventive zinc supplementation increases the antibody response against pathogenic *Escherichia coli* in children with zinc insufficiency: a randomised controlled trial

**Authors:** Chidchamai Kewcharoenwong<sup>1#</sup>, Myint Myint Sein<sup>2#</sup>, Arnone Nithichanon<sup>3</sup>, Aranya Kongmee<sup>2</sup>, K Ryan Wessells<sup>4</sup>, Guy-Marino Hinnouho<sup>4,5</sup>, Maxwell A Barffour<sup>4,6</sup>, Sengchanh Kounnavong<sup>7</sup>, Sonja Y Hess<sup>4</sup>, Charles B Stephensen<sup>4,8</sup>, and Ganjana Lertmemongkolchai<sup>1,2\*</sup>

**Authors' institutions:**

<sup>1</sup>Faculty of Associated Medical Sciences, Chiang Mai University, Chiang Mai, Thailand; <sup>2</sup>The Centre for Research & Development of Medical Diagnostic Laboratories, Faculty of Associated Medical Sciences, Khon Kaen University, Khon Kaen, Thailand; <sup>3</sup>Research and Diagnostic Center for Emerging Infectious Diseases (RCEID), Department of Microbiology Faculty of Medicine, Khon Kaen University, Khon Kaen, Thailand; <sup>4</sup>Institute for Global Nutrition, Department of Nutrition, University of California, Davis, CA, USA; <sup>5</sup>Helen Keller International, Washington, DC, USA; <sup>6</sup>College of Health and Human Services, Public Health Program, Missouri State University, Springfield, MO, USA; <sup>7</sup>Lao Tropical and Public Health Institute, Vientiane, Lao People's Democratic Republic; <sup>8</sup>Agricultural Research Service, Western Human Nutrition Research Center, USDA, Davis, CA, USA

**\*Corresponding authors:** Ganjana Lertmemongkolchai, Faculty of Associated Medical Sciences, Chiang Mai University, Chiang Mai, Thailand, 50200; e-mail: [ganjana.l@cmu.ac.th](mailto:ganjana.l@cmu.ac.th) <sup>#</sup>These two authors contributed equally to this work.

## Supplementary materials

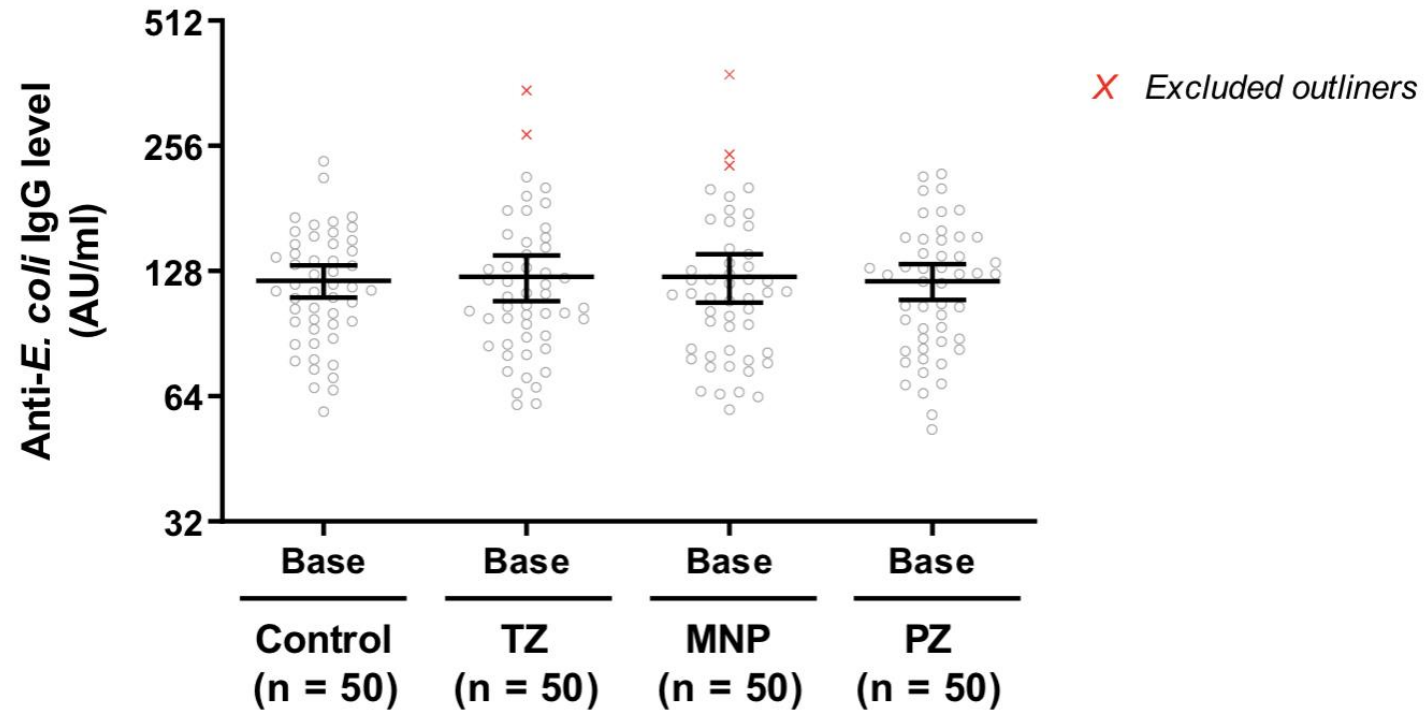

Supplementary Figure S1: Distribution of anti-*Escherichia coli* IgG among the four studied groups. Outliers are shown in red and were excluded from the analysis.

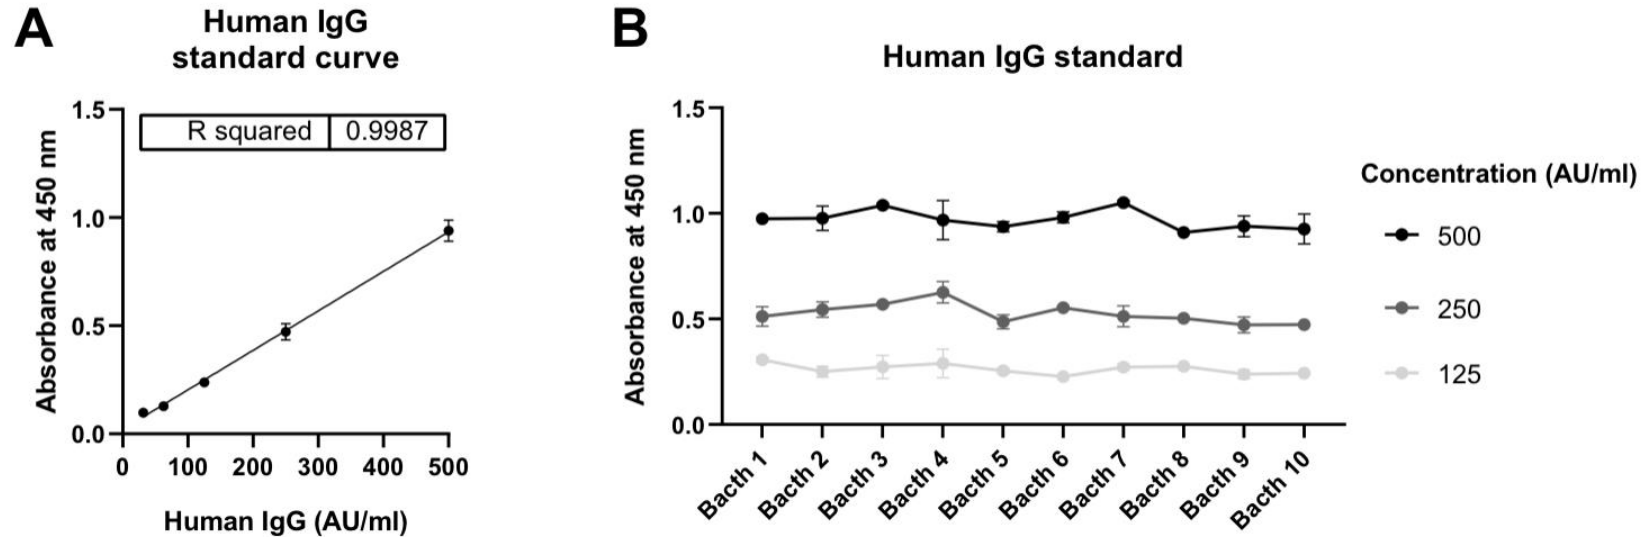

**Supplementary Figure S2: Standardisation of human IgG concentration (AU/ml) quantified by enzyme-linked immunosorbent assay (ELISA).** Various concentrations of purified human plasma IgG (starting from 50 AU/ml) were coated on ELISA plates. (A) The absorbance of each concentration of the representative plate. (B) Variation in the absorbance of the standard at 500, 250 and 125 AU/ml from each experimental batch.

Supplementary Table S1: Plasma IgG level and the percentages of avidity index in response to pathogenic *E.coli*

| Results             |                             | All<br>(n=200) | Control<br>(n=50) | TZ<br>(n=50)   | MNP<br>(n=50)  | PZ<br>(n=50)   |
|---------------------|-----------------------------|----------------|-------------------|----------------|----------------|----------------|
| IgG level,<br>AU/ml | Baseline                    | 122.63 ± 48.70 | 121.40 ± 37.96    | 124.04 ± 54.78 | 123.99 ± 58.11 | 121.08 ± 41.90 |
|                     | Endline                     | 133.07 ± 60.14 | 125.38 ± 43.29    | 141.04 ± 74.15 | 133.37 ± 66.40 | 132.47 ± 52.04 |
|                     | <b>P value</b> <sup>#</sup> | <0.0001        | 0.3787            | 0.0002         | 0.0215         | 0.0009         |
| Avidity index,<br>% | Baseline                    | 73.37 ± 10.43  | 74.77 ± 7.15      | 73.31 ± 13.16  | 72.51 ± 10.00  | 72.90 ± 10.81  |
|                     | Endline                     | 75.42 ± 10.18  | 77.60 ± 8.42      | 74.84 ± 12.02  | 73.53 ± 10.57  | 75.73 ± 9.34   |
|                     | <b>P value</b> <sup>#</sup> | <0.0001        | 0.0080            | 0.9695         | 0.1742         | 0.0019         |

Values are means ± SDs.

<sup>#</sup>Variables were compared by Two Way ANOVA between baseline and endline of each intervention group.

Control, placebo; TZ, therapeutic dispersible zinc tablets; MNP, daily multiple micronutrient powder; PZ, daily preventive zinc tablets.

**Supplementary Table S2: The number of children whose IgG ratio between endline and baseline were changed more than 10% in response to pathogenic *E.coli***

| <b>Results</b>       | <b>All<br/>(n=200)</b> | <b>Control<br/>(n=50)</b> | <b>TZ<br/>(n=50)</b> | <b>MNP<br/>(n=50)</b> | <b>PZ<br/>(n=50)</b> |
|----------------------|------------------------|---------------------------|----------------------|-----------------------|----------------------|
| Increased<br>(> 10%) | 66                     | 11                        | 21                   | 18                    | 16                   |
| Not changed          | 114                    | 33                        | 24                   | 24                    | 33                   |
| Decreased<br>(> 10%) | 20                     | 6                         | 5                    | 8                     | 1                    |

Values are number of children.

Control, placebo; TZ, therapeutic dispersible zinc tablets; MNP, daily multiple micronutrient powder; PZ, daily preventive zinc tablets.

**Supplementary Table S3: The number of children whose %avidity index ratio between endline and baseline were changed more than 5% in response to pathogenic *E.coli***

| <b>Results</b>      | <b>All<br/>(n=200)</b> | <b>Control<br/>(n=50)</b> | <b>TZ<br/>(n=50)</b> | <b>MNP<br/>(n=50)</b> | <b>PZ<br/>(n=50)</b> |
|---------------------|------------------------|---------------------------|----------------------|-----------------------|----------------------|
| Increased<br>(> 5%) | 62                     | 18                        | 14                   | 17                    | 13                   |
| Not changed         | 107                    | 28                        | 21                   | 23                    | 35                   |
| Decreased<br>(> 5%) | 31                     | 4                         | 15                   | 10                    | 2                    |

Values are number of children.

Control, placebo; TZ, therapeutic dispersible zinc tablets; MNP, daily multiple micronutrient powder; PZ, daily preventive zinc tablets.
